# Supplementary material for: The impact of long-acting GnRHa pretreatment on the clinical pregnancy outcomes of hormone replacement therapy-frozen embryo transfer in RIF patients with PCOS: a retrospective clinical study
Source: Research Square preprint supplement (doi:10.21203/rs.3.rs-4869543/v1), 2024-09-16
Supplement: Supplementary file 1 [file 6a64f83966a81c99edcf5321.docx]

|  | **Statistics** | **Clinical pregnancy** |
| --- | --- | --- |
| **Female age (years)** | 31.89 ± 4.14 | 0.953 (0.931, 0.977) <0.001 |
| **Male age (years)** | 33.49 ± 5.07 | 0.972 (0.953, 0.991) 0.005 |
| **GnRHa** |  |  |
| **No** | 1283 (80.09%) | 1 |
| **Yes** | 319 (19.91%) | 1.594 (1.243, 2.044) <0.001 |
| **BMI (kg/m2)** | 22.61 ± 3.15 | 1.001 (0.970, 1.033) 0.951 |
| **Infertility type** |  |  |
| **Primary infertility** | 869 (54.25%) | 1 |
| **Secondary infertility** | 733 (45.75%) | 0.873 (0.717, 1.063) 0.176 |
| **Duration of infertility (years)** | 3.99 ± 2.92 | 0.974 (0.942, 1.008) 0.136 |
| **AMH (ng/mL)** | 3.56 ± 2.44 | 1.104 (1.000, 1.218) 0.049 |
| **Basic FSH (IU/L)** | 7.36 ± 2.52 | 0.971 (0.933, 1.011) 0.156 |
| **Basic LH (IU/L)** | 5.01 ± 3.41 | 1.008 (0.979, 1.038) 0.577 |
| **AFC (n)** | 16.9 ± 7.7 | 1.119 (0.998, 1.321) 0.449 |
| **PCOS** |  |  |
| **No** | 1130 (70.54%) | 1 |
| **Yes** | 472 (29.46%) | 1.212 (0.978, 1.503) 0.080 |
| **Endometrium thickness (mm)** | 9.55 ± 1.48 | 1.132 (1.049, 1.220) 0.001 |
| **Number of transferred embryos** |  |  |
| **1** | 577 (36.02%) | 1 |
| **2** | 1025 (63.98%) | 1.76 (1.43, 2.16) <0.001 |
| **Embryo quality** |  |  |
| **0** | 789 (49.25%) | 1 |
| **1** | 813 (50.75%) | 1.49 (1.22, 1.81) <0.001 |
| **Type of transferred embryos** |  |  |
| **Cleavage-stage embryo** | 988 (61.67%) | 1 |
| **Blastocyst** | 595 (37.14%) | 1.28 (1.05, 1.57) 0.016 |
| **Sequential transfer** | 19 (1.19%) | 3.11 (1.11, 8.70) 0.031 |

**Table S1.** Univariate analysis of total FET cycles.
