# Supplementary material for: The impact of long-acting GnRHa pretreatment on the clinical pregnancy outcomes of hormone replacement therapy-frozen embryo transfer in RIF patients with PCOS: a retrospective clinical study
Source: Research Square preprint supplement (doi:10.21203/rs.3.rs-4869543/v1), 2024-09-16
Supplement: Supplementary file 2 [file cb213674d9d094f4824ce294.docx]

**Table S3.** Characteristics ofFET cycles according to different endometrial preparation protocols in patients with PCOS.

| **Group** | **HRT** | **GnRHa-HRT** | **P-value** |
| --- | --- | --- | --- |
| **Number** | 409 | 63 |  |
| **Female age (years)** | 30.62 ± 3.71 | 29.89 ± 3.63 | 0.145 |
| **Male age (years)** | 32.380 ± 4.62 | 31.43 ± 3.64 | 0.12 |
| **BMI (kg/m2)** | 22.93 ± 3.22 | 23.40 ± 3.28 | 0.292 |
| **Duration of infertility (years)** | 3.72 ± 2.53 | 3.50 ± 2.15 | 0.512 |
| **AMH (ng/mL)** | 5.74 ± 2.53 | 5.65 ± 3.64 | 0.924 |
| **Basic FSH (IU/L)** | 6.55 ± 1.59 | 6.42 ± 1.47 | 0.544 |
| **Basic LH (IU/L)** | 6.37 ± 4.72 | 7.11 ± 4.62 | 0.251 |
| **AFC (n)** | 30.51 ± 9.89 | 33.76 ± 12.34 | 0.072 |
| **Endometrium thickness (mm)** | 9.53 ± 1.45 | 10.01 ± 1.88 | 0.028 |
| **Implanted embryo number (n)** | 0.66 ± 0.71 | 0.83 ± 0.71 | 0.083 |
| **Fertilization mode** |  |  | 0.918 |
| **IVF** | 306 (74.82%) | 49 (77.78%) |  |
| **ICSI** | 76 (18.58%) | 10 (15.87%) |  |
| **RICSI** | 10 (2.45%) | 1 (1.59%) |  |
| **TESA/PESA-ICSI** | 17 (4.15%) | 3 (4.76%) |  |
| **Infertility type** |  |  | 0.301 |
| **Primary infertility** | 238 (58.19%) | 41 (65.08%) |  |
| **Secondary infertility** | 171 (41.81%) | 22 (34.92%) |  |
| **Number of transferred embryos** |  |  | 0.305 |
| **1** | 137 (33.50%) | 17 (26.98%) |  |
| **2** | 272 (66.50%) | 46 (73.02%) |  |
| **Embryo quality** |  |  | 0.02 |
| **0** | 194 (47.43%) | 20 (31.75%) |  |
| **1** | 215 (52.57%) | 43 (68.25%) |  |
| **Type of transferred embryos** |  |  | 0.97 |
| **Cleavage-stage embryo** | 236 (57.70%) | 36 (57.14%) |  |
| **Blastocyst** | 168 (41.08%) | 26 (41.27%) |  |
| **Sequential transfer** | 5 (1.22%) | 1 (1.59%) |  |
| **Clinical pregnancy rate** | 211 (51.59%) | 41 (65.08%) | 0.046 |
| **Early miscarriage rate** | 24 (10.86%) | 5 (12.20%) | 0.880 |
