# Supplementary material for: The impact of long-acting GnRHa pretreatment on the clinical pregnancy outcomes of hormone replacement therapy-frozen embryo transfer in RIF patients with PCOS: a retrospective clinical study
Source: Research Square preprint supplement (doi:10.21203/rs.3.rs-4869543/v1), 2024-09-16
Supplement: Supplementary file 3 [file d69398a408b62e473a7e914e.docx]

**Table S2.** Characteristics ofFET cycles according to different endometrial preparation protocols in patients without PCOS.

| **Group** | **HRT** | **GnRHa-HRT** | **P-value** |
| --- | --- | --- | --- |
| **Number** | 874 | 256 |  |
| **Female age (years)** | 32.49 ± 4.24 | 32.35 ± 3.97 | 0.636 |
| **Male age (years)** | 34.07 ± 5.29 | 33.80 ± 4.87 | 0.463 |
| **BMI (kg/m2)** | 22.48 ± 3.12 | 22.35 ± 3.07 | 0.576 |
| **Duration of infertility (years)** | 4.11 ± 3.04 | 4.10 ± 3.20 | 0.938 |
| **AMH (ng/mL)** | 2.38 ± 1.30 | 2.57 ± 1.38 | 0.347 |
| **Basic FSH (IU/L)** | 7.71 ± 2.80 | 7.71 ± 2.55 | 0.981 |
| **Basic LH (IU/L)** | 4.39 ± 2.51 | 4.48 ± 2.26 | 0.603 |
| **AFC (n)** | 10.23 ± 4.12 | 10.44 ± 5.19 | 0.578 |
| **Endometrium thickness (mm)** | 9.37 ± 1.33 | 9.97 ± 1.70 | <0.001 |
| **Implanted embryo number (n)** | 0.56 ± 0.67 | 0.72 ± 0.70 | 0.002 |
| **Fertilization mode** |  |  | 0.737 |
| **IVF** | 618 (70.79%) | 174 (67.97%) |  |
| **ICSI** | 186 (21.31%) | 63 (24.61%) |  |
| **RICSI** | 25 (2.86%) | 7 (2.73%) |  |
| **TESA/PESA-ICSI** | 44 (5.04%) | 12 (4.69%) |  |
| **Infertility type** |  |  | 0.537 |
| **Primary infertility** | 452 (51.72%) | 138 (53.91%) |  |
| **Secondary infertility** | 422 (48.28%) | 118 (46.09%) |  |
| **Number of transferred embryos** |  |  | 0.112 |
| **1** | 338 (38.67%) | 85 (33.20%) |  |
| **2** | 536 (61.33%) | 171 (66.80%) |  |
| **Embryo quality** |  |  | 0.302 |
| **0** | 452 (51.72%) | 123 (48.05%) |  |
| **1** | 422 (48.28%) | 133 (51.95%) |  |
| **Type of transferred embryos** |  |  | 0.102 |
| **Cleavage-stage embryo** | 568 (64.99%) | 148 (57.81%) |  |
| **Blastocyst** | 297 (33.98%) | 104 (40.63%) |  |
| **Sequential transfer** | 9 (1.03%) | 4 (1.56%) |  |
| **Clinical pregnancy rate** | 401 (45.88%) | 148 (57.81%) | <0.001 |
| **Early miscarriage rate** | 54 (13.47%) | 22 (14.86%) | 0.674 |
